# Supplementary material for: The Level of Methionine Residues in Storage Proteins Is the Main Limiting Factor of Protein-Bound-Methionine Accumulation in Arabidopsis Seeds
Source: Front Plant Sci. 2020 Aug 5;11:1136. doi: 10.3389/fpls.2020.01136 (PMC7419676; doi:10.3389/fpls.2020.01136)
Supplement: Supplementary file 1 [file DataSheet_1.xlsx]

## Sheet: Table S1
Supplemental Table S1. List of primers used for PCR and qRT-PCR analyses.
Gene Name	AGI	Forward Primer	Reverse Primer
Primers used for PCR
AtCGS	At3g01120	5'-TGGCTGATCAAGATCGCCGCG-3'	5'-CAGCACGACGGGAGGCGC-3'
SSA/SF8	X56686	5'-GGGAATTCCCGGGTTTACATTTGGCATGG-3'	5'-GGGGATCCATGGCAAGGTTTTCGATCG-3'
Primers used for qRT-PCR
AtPP2A	At1g13320	5'-TGTTGGAGCCCCAGGACTGT-3'	5'-CGTCCTAGTTGGCTCCGGTC-3'
AtCGS	At3g01120	5'-CTTGGTTCGTTTCAGCTTTGG-3'	5'-ATAGGGATAGCCCGCATAGT-3'
At-DCGS	At3g01120	5'-GGTTTGCATTGATGGCACCT -3'	5'-GCGTTTGGGTTAAGTGTTCCTC-3'
SSA/SF8	X56686	5'-CCATCATCACCACCATCATAGA-3'	5'-ACTTGGCTCCTTTCTCCTAAAT-3'

## Sheet: Table S2
Supplementary Table S2. Primary metabolite contents in the transgenic seeds of A1S, A2S, A1, A2, SSE and EV following GC-MS analysis.
	EV	SSE	A1	A2	A1S	A2S
Butanoic acid	17423394.4±1013231.9(d)	20405810±973873.8(cd)	23230457.9±2623701(bc)	20383328.7±722586(cd)	26012767.9±4076712.9(ab)	30549450.7±3397190.7(a)
Propanoic acid	5519690.4±540272.5(c)	10124020.6±4542743.6(ab)	5898347.8±645266.7(bc)	6916921.3±354379.9(abc)	7286009.1±418815.3(abc)	11106393±3153580.6(a)
Phosphoric acid (3TMS)	13868793.8±2384987(c)	34799872±12613369.5(ab)	53991193.9±20115450(a)	15621122.3±2259493.7(bc)	19588624.3±4808533.3(bc)	16708756.3±4647265.9(bc)
Ethanolamine (3TMS)	320302.8±95806.2(b)	968836.6±236406.6(a)	1430065±348089(a)	1067981.3±320862.4(a)	1172524.3±163478.3(a)	1016100.8±414567.7(a)
Glycerol (3TMS)	5698612.5±1209056.1(b)	14047955.1±1865284.7(ab)	20596965.7±10173325.8(a)	11978399.8±1371256.3(ab)	13724052.1±1859086.6(ab)	12257726±2469710.3(ab)
Nicotinic acid	1614227.2±171890.4(d)	2163435.7±297139.4(abc)	1977796.1±189674.9(bcd)	1797130.3±130933(cd)	2254712.3±240862.5(ab)	2443312.6±169835.6(a)
Glyceric acid	413959.2±29646.2(b)	484246.1±41433.9(ab)	446024±72817.3(b)	289329.3±16256.5(c)	563795.9±96083.2(a)	447593.5±38089.9(b)
Fumaric acid (2TMS)	6617810.9±2523937.6(b)	12320954.3±2407587.4(ab)	8803290.7±2076111(ab)	5210364.8±507646.1(b)	15999597.7±8478915.1(a)	8569714.5±1714569.9(ab)
Lumichrome	90621.3±49041.8(a)	279010.1±154626.7(a)	323500.2±314943.6(a)	122671.8±8421.2(a)	121597.5±11248(a)	103840.3±19204.3(a)
ACC Cyclopropane carboxylic acid	2932850.7±683408.1(b)	7126347±3645309.5(a)	4801462.1±489895.4(ab)	2339093.8±238399.5(b)	3512998.2±785222.1(b)	3928492.6±231391(b)
Malic acid	6350059.3±1572916.7(ab)	7765981.1±2522790.7(a)	5145385.2±676496(bc)	2582133.6±239813(c)	5145536±987695.8(bc)	2581489±264213.2(c)
Pyroglutamic acid	756907.7±208198.6(c)	974967.7±139270.8(bc)	1925589.1±231760.9(a)	1136598.1±98497.3(b)	1070112.3±137774.6(bc)	930213.8±205287.6(bc)
Glutamic acid (2TMS)	45405.7±23403.2(b)	89093.3±16897.8(a)	108681.6±36237.3(a)	24696.1±4722.8(b)	41122.3±5170.4(b)	29283.1±10189.1(b)
Propanedioic acid	1350474.5±93218.6(b)	2191534.1±336831.4(a)	1962651.8±218178(a)	1535796.4±88092.7(b)	1282429.1±180376.9(b)	1191474.3±134577(b)
Xylose	69973.7±8408.8(b)	142686±35350.3(a)	157564.6±34469.6(a)	65852.4±6478.2(b)	58621.6±15250.1(b)	64999.3±21089.6(b)
Arabinose MP	233727±83727.7(b)	612032.9±51667.4(a)	220696.9±27455.5(b)	172384.2±13314.4(b)	254089.1±34754.1(b)	188964.8±10200.1(b)
Arabitol	69125.2±8009.5(b)	120334.8±29424.3(a)	157564.6±34469.6(a)	59521±2370.2(b)	58621.6±15250.1(b)	64999.3±21089.6(b)
Xylitol	281732.1±20203(b)	393951.6±59090.3(a)	382896.4±111575.1(a)	154749.5±7867.8(c)	299950.2±44701.1(b)	228357.6±19762.7(b)
Citric acid	13507844.7±1305309.8(bc)	21787615.7±2830709(ab)	26736416.8±9145540.2(a)	11962649.9±446243.2(c)	16750318.6±4114229.4(bc)	10280325.4±1779352.6(c)
Talose	131019.3±33080.9(ab)	184361.6±39184.4(a)	188977.8±53465(a)	87014.4±10301.4(b)	116836.3±22333.9(b)	84047.4±12173.7(b)
Fructose, MP	2122789.3±288031.1(c)	5983151.5±1142192.9(a)	4800060.8±1333133.6(ab)	2114216.5±278939(c)	6697514.5±1691084.7(a)	3521206.3±910095.5(bc)
NA3 28.863	41547.8±15889.5(b)	101583.4±66921.9(a)	67617.7±11959(ab)	39844.9±4174.5(b)	37143.1±8785.9(b)	44706.9±13816.5(b)
MannoseMP	7123833.9±780510.4(b)	7919532.2±987350.6(ab)	7829180±1122132.7(ab)	7347766.7±312628.1(b)	8701903.8±1108398.4(a)	7871707.7±472881.2(ab)
Glucose (5TMS) MP	24317655.6±2313548(c)	31501510.5±3601064.8(a)	27177420.5±1753557.1(b)	23114214.3±1323172.7(c)	24718284.4±1826142.5(bc)	23918651.8±1123006.7(c)
Mannitol (6TMS)	3444013.1±2586262.6(c)	4987571.2±910733.8(bc)	10496115±2696455.6(a)	3438604.5±615762.7(c)	7523846.6±993011.5(ab)	4204305.9±728400.7(c)
Sorbitol (6TMS)	774176.2±58616.5(c)	2094782.6±382449.9(a)	1587009.7±354833(b)	925089.9±114531(c)	1500512.7±102763.1(b)	831609.1±212618.6(c)
Galactonic acid	70243.7±13609.5(c)	143392.9±37668.9(b)	217358.6±66809.8(a)	108849.1±8229.4(bc)	196277.9±39201.4(a)	110128±18503.2(bc)
Gluconic acid_a	3047219.6±686239.5(bc)	6107661.1±1013075.9(a)	6170595.5±1245070.9(a)	3559396.9±176762.6(bc)	4849319.3±1109069(b)	2713582.3±580466.9(c)
Hexadecanoic acid= palmatic acid	3056125.7±394297.9(b)	9442581.7±1876115.5(a)	3817846.5±644229.2(b)	2926138.2±183052.1(b)	3171010.6±289801.9(b)	3233717.3±271215.6(b)
Galactose (6TMS)	2432646±562555.6(b)	18589658.3±15408090.4(a)	23639448.6±2921081.1(a)	16444062.4±2538258.8(a)	2915577.7±764506.9(b)	1826015.5±239858(b)
Inositol, myo- (6TMS)	17746703.7±1131085.4(bc)	26096755.6±7373191.2(a)	29543554.7±6313684.9(a)	14275203±524063.3(c)	20068124.8±491239(b)	17685115.9±1708834(bc)
Octadecanoic acid (1TMS)	2847579.9±312653.1(b)	9739266.2±2763493.1(a)	3203018.8±126676.5(b)	2837071.5±250397.1(b)	3517637.2±166913.5(b)	3384692.8±354009(b)
Sinapic acid	4433963.9±987813.2(d)	9186483.2±2833686.8(bc)	6809347±1416895.3(cd)	6111019±594049.4(cd)	11230880.8±1782970(ab)	13500042.5±1753696.1(a)
Glucopyranose	676118.3±194901.6(b)	1762115.6±650868.9(a)	925941.4±311192.6(b)	758507.8±75322.9(b)	1005100.2±111284.9(b)	1084997.8±199380.5(b)
Cellobiose	397430.5±56109.6(c)	1029767.1±276896(a)	353373.6±71182.6(c)	588173.8±37572.2(bc)	824107.1±91514.9(ab)	984138.2±16484.1(a)
Sucrose (8TMS)	469246975.8±133069464.8(d)	650154481.1±69905429.2(bc)	557700571.9±48327478.4(cd)	514987312±21697472.2(d)	665291652.9±61241341(b)	808923294.3±75407885.2(a)
Trehalose alpha (8TMS)	156254104.8±17125771.8(b)	295562290.7±83676243.2(a)	175011905.3±27543050.3(b)	178851073.7±7253238.1(b)	305494555.8±53586570.7(a)	334188876.8±25514664.5(a)
Catechin	229892.6±172830.2(b)	2029072.9±979341.4(a)	2364732.1±645411.6(a)	590988.2±82001(b)	488371.4±311883.6(b)	972857.1±212270.8(b)
Galactinol	6574027.1±1859410.8(d)	21798818.3±6049428.7(a)	14186313.9±2691679.1(bc)	11848660.6±1315694.2(c)	18389921.8±5372529.1(ab)	21468350.9±3371676(a)
Gentobiose BP	1199717.9±272343.5(c)	1942007.8±357263.1(b)	1403203.9±164768.8(c)	1268035.1±89832.9(c)	2059721.8±307015.4(b)	2858724.2±668045.4(a)
Rafinose	2405600±295752.8(c)	3917810.6±588558.2(abc)	3313133.2±1168838.5(bc)	2624829.4±335973.8(bc)	4536226±529176.4(ab)	5445295.6±1983039.1(a)
Quantities of metabolites analyzed using GC-MS analysis and normalized to the internal standard of norleucine. Data shown are means ± SD of five distinct pool of biological replicates. Significance was calculated by using two-way ANOVA and signnificance p < 0.05 represented by different letters.
